# Supplementary material
Source: PubMed Central journal article supplement (PMC4924585)
Supplement: bph0172-5147-sd1.pdf [file bph0172-5147-sd1.pdf]

## Supporting information

# Human induced pluripotent stem cell-derived versus adult cardiomyocytes: an *in silico* electrophysiological study on ionic current block effects

Michelangelo Paci, Jari Hyttinen, Blanca Rodriguez, Stefano Severi

## Changes to the Paci2013 model

In this paper we used a slightly modified version of the Paci2013 model presented in (Paci et al., 2013).

Inclusion of  $I_f$  contribution ( $I_{fNa}$ ) to the intracellular  $Na^+$  mass balance equation:

$$\frac{dNa_i}{dt} = -C_m \cdot \frac{I_{Na} + I_{bNa} + 3I_{NaK} + 3I_{NaCa} + I_{fNa}}{F \cdot V_c}$$

$$I_{fNa} = 0.42 \cdot g_f \cdot X_f \cdot (V - E_{Na})$$

Tuning of maximum conductances/currents/fluxes, to balance the intracellular concentrations of  $Na^+$  and  $Ca^{2+}$  and the  $Ca^{2+}$  concentration in the sarcoplasmic reticulum.

|                       | Ventricular-like | Atrial-like |
|-----------------------|------------------|-------------|
| $K_{NaCa}$ (A/F)      | 5978             | 2989        |
| $P_{NaK}$ (A/F)       | 2.2958           | 1.7678      |
| $g_{bNa}$ (S/F)       | 0.95             | 0.95        |
| $g_{bCa}$ (S/F)       | 0.727272         | 0.727272    |
| $V_{max_{up}}$ (mM/s) | ---              | 0.198       |
| $C_{rel}$ (mM/s)      | 0                | 0           |

## Stimulation protocol and simulation of ionic current block

Two different stimulation protocols were used for the VL and AL hiPSC-CM models, due to the different spontaneous beating rate: (i) VL hiPSC-CM was stimulated at 60 bpm with depolarizing current pulses of 5 ms duration and 10 pA/pF amplitude, (ii) AL hiPSC-CM was stimulated at 80 bpm with pulses of 5 ms duration and 9 pA/pF amplitude. The hAdultV-CM was stimulated as in (O'Hara et al., 2011) at 60 bpm with stimulus of 0.5 ms duration and 80 pA/pF amplitude.

For three currents biomarkers were not computed at steady state but in different conditions, in detail:

- 7 s after block for all  $I_{Kr}$  blocks;
- 10 beats after block for  $I_{NaCa}$  full block;
- immediately after administration of the blocker for  $I_{K1}$  full block.

## Supplementary tables

Table S1a – AP biomarkers changes induced by the different blockade levels in the stimulated ventricular-like model. <sup>a</sup>: biomarkers computed 7s after  $I_{Kr}$  blocker administration. <sup>b</sup>: biomarkers computed after 10 beats after  $I_{NaCa}$  full block of, due to non-representative ionic concentration at the steady state.

|            |                             | MDP (mV)               | VMax (V/s) | APA (mV) | Peak (mV) | APD30 (ms) | APD50 (ms) | APD70 (ms) | APD90 (ms) | APD <sub>ratio</sub> |
|------------|-----------------------------|------------------------|------------|----------|-----------|------------|------------|------------|------------|----------------------|
|            | Control                     | -76.2                  | 47.4       | 115      | 38.5      | 258        | 367        | 418        | 469        | 3.41                 |
| $I_{Na}$   | 0.1× $I_{C50}$              | -76.2                  | 44.5       | 113      | 36.9      | 267        | 371        | 420        | 470        | 3.37                 |
|            | $I_{C50}$                   | -76.5                  | 29.0       | 108      | 31.7      | 292        | 380        | 421        | 475        | 2.82                 |
|            | 2× $I_{C50}$                | -76.7                  | 22.2       | 106      | 29.8      | 296        | 379        | 418        | 473        | 2.72                 |
|            | FULL                        | -76.9                  | 10.2       | 103      | 26.3      | 292        | 375        | 416        | 475        | 2.40                 |
| $I_{CaL}$  | 0.1× $I_{C50}$              | -76.2                  | 48.8       | 115      | 39.1      | 225        | 332        | 382        | 431        | 3.46                 |
|            | $I_{C50}$                   | -76.4                  | 51.6       | 117      | 40.4      | 73         | 152        | 191        | 227        | 3.18                 |
|            | 2× $I_{C50}$                | -76.1                  | 49.8       | 115      | 39.1      | 47         | 100        | 132        | 162        | 2.20                 |
|            | FULL                        | -75.1                  | 45.7       | 110      | 34.9      | 24         | 47         | 71         | 96         | 1.05                 |
| $I_{Kr}$   | 0.1× $I_{C50}$ <sup>a</sup> | -76.1                  | 46.8       | 114      | 38.1      | 272        | 387        | 441        | 493        | 3.53                 |
|            | $I_{C50}$ <sup>a</sup>      | -76.1                  | 38.0       | 110      | 34.1      | 371        | 524        | 584        | 648        | 3.86                 |
|            | 2× $I_{C50}$ <sup>a</sup>   | -75.9                  | 30.8       | 108      | 32.1      | 420        | 602        | 664        | 732        | 4.71                 |
|            | FULL <sup>a</sup>           | -71.9                  | 14.1       | 95       | 23.6      | 560        | 825        | 884        | 938        | 8.26                 |
| $I_{Ks}$   | 0.1× $I_{C50}$              | -76.2                  | 47.3       | 115      | 38.5      | 259        | 368        | 419        | 470        | 3.41                 |
|            | $I_{C50}$                   | -76.1                  | 46.9       | 115      | 38.4      | 264        | 373        | 425        | 475        | 3.48                 |
|            | 2× $I_{C50}$                | -76.1                  | 46.9       | 114      | 38.3      | 266        | 375        | 427        | 477        | 3.54                 |
|            | FULL                        | -76.1                  | 46.7       | 114      | 38.2      | 270        | 380        | 432        | 482        | 3.60                 |
| $I_{K1}$   | 0.1× $I_{C50}$              | -75.3                  | 42.1       | 112      | 36.5      | 278        | 382        | 435        | 488        | 3.05                 |
|            | $I_{C50}$                   | -69.5                  | 22.4       | 104      | 34.9      | 325        | 435        | 520        | 599        | 1.72                 |
|            | 2× $I_{C50}$                | -64.3                  | 16.8       | 98       | 34.1      | 336        | 449        | 561        | 701        | 0.91                 |
|            | FULL                        | REPOLARIZATION FAILURE |            |          |           |            |            |            |            |                      |
| $I_f$      | 0.1× $I_{C50}$              | -76.3                  | 48.6       | 115      | 39.0      | 258        | 368        | 420        | 471        | 3.52                 |
|            | $I_{C50}$                   | -76.9                  | 54.4       | 118      | 41.2      | 261        | 376        | 429        | 484        | 3.59                 |
|            | 2× $I_{C50}$                | -77.2                  | 57.4       | 119      | 42.1      | 261        | 379        | 432        | 490        | 3.60                 |
|            | FULL                        | -78.1                  | 64.0       | 122      | 44.1      | 262        | 386        | 440        | 503        | 3.71                 |
| $I_{NaCa}$ | 0.1× $I_{C50}$              | -76.0                  | 47.2       | 115      | 38.7      | 260        | 364        | 413        | 460        | 3.57                 |
|            | $I_{C50}$                   | -75.3                  | 46.3       | 115      | 39.4      | 280        | 364        | 402        | 435        | 3.73                 |
|            | 2× $I_{C50}$                | -75.7                  | 47.1       | 117      | 40.8      | 286        | 369        | 405        | 433        | 4.22                 |
|            | FULL <sup>b</sup>           | -84.9                  | 75.2       | 136      | 51.4      | 223        | 312        | 342        | 363        | 5.77                 |
| $I_{to}$   | 0.1× $I_{C50}$              | -76.1                  | 47.3       | 115      | 38.6      | 259        | 368        | 419        | 470        | 3.46                 |
|            | $I_{C50}$                   | -76.1                  | 46.7       | 115      | 39.1      | 263        | 374        | 425        | 476        | 3.49                 |
|            | 2× $I_{C50}$                | -76.0                  | 46.4       | 115      | 39.4      | 263        | 376        | 428        | 478        | 3.64                 |
|            | FULL                        | -76.0                  | 46.2       | 116      | 40.5      | 263        | 379        | 433        | 482        | 3.79                 |

Table S1b – AP biomarkers percent variations with respect to the control AP induced by the different blockade levels in the stimulated ventricular-like model. <sup>a</sup>: biomarkers computed 7s after  $I_{Kr}$  blocker administration. <sup>b</sup>: biomarkers computed after 10 beats after  $I_{NaCa}$  full block of, due to non-representative ionic concentration at the steady state.

|            |                                   | Percent variation (%)  |      |     |      |       |       |       |       |                      |
|------------|-----------------------------------|------------------------|------|-----|------|-------|-------|-------|-------|----------------------|
|            |                                   | MDP                    | VMax | APA | Peak | APD30 | APD50 | APD70 | APD90 | APD <sub>ratio</sub> |
| $I_{Na}$   | 0.1×IC <sub>50</sub>              | 0                      | -6   | -1  | -4   | 3     | 1     | 0     | 0     | -1                   |
|            | IC <sub>50</sub>                  | 0                      | -39  | -6  | -18  | 13    | 4     | 1     | 1     | -17                  |
|            | 2×IC <sub>50</sub>                | 1                      | -53  | -7  | -23  | 14    | 3     | 0     | 1     | -20                  |
|            | FULL                              | 1                      | -78  | -10 | -32  | 13    | 2     | -1    | 1     | -30                  |
| $I_{CaL}$  | 0.1×IC <sub>50</sub>              | 0                      | 3    | 1   | 1    | -13   | -10   | -9    | -8    | 1                    |
|            | IC <sub>50</sub>                  | 0                      | 9    | 2   | 5    | -72   | -59   | -54   | -52   | -7                   |
|            | 2×IC <sub>50</sub>                | 0                      | 5    | 0   | 2    | -82   | -73   | -68   | -66   | -35                  |
|            | FULL                              | -1                     | -4   | -4  | -9   | -91   | -87   | -83   | -80   | -69                  |
| $I_{Kr}$   | 0.1×IC <sub>50</sub> <sup>a</sup> | 0                      | -1   | 0   | -1   | 5     | 5     | 5     | 5     | 4                    |
|            | IC <sub>50</sub> <sup>a</sup>     | 0                      | -20  | -4  | -12  | 44    | 43    | 40    | 38    | 13                   |
|            | 2×IC <sub>50</sub> <sup>a</sup>   | 0                      | -35  | -6  | -17  | 63    | 64    | 59    | 56    | 38                   |
|            | FULL <sup>a</sup>                 | -6                     | -70  | -17 | -39  | 117   | 125   | 111   | 100   | 142                  |
| $I_{Ks}$   | 0.1×IC <sub>50</sub>              | 0                      | 0    | 0   | 0    | 0     | 0     | 0     | 0     | 0                    |
|            | IC <sub>50</sub>                  | 0                      | -1   | 0   | 0    | 2     | 2     | 2     | 1     | 2                    |
|            | 2×IC <sub>50</sub>                | 0                      | -1   | 0   | -1   | 3     | 2     | 2     | 2     | 4                    |
|            | FULL                              | 0                      | -1   | 0   | -1   | 4     | 4     | 3     | 3     | 6                    |
| $I_{K1}$   | 0.1×IC <sub>50</sub>              | -1                     | -11  | -3  | -5   | 8     | 4     | 4     | 4     | -11                  |
|            | IC <sub>50</sub>                  | -9                     | -53  | -9  | -10  | 26    | 18    | 24    | 28    | -49                  |
|            | 2×IC <sub>50</sub>                | -16                    | -65  | -14 | -12  | 30    | 22    | 34    | 50    | -73                  |
|            | FULL                              | REPOLARIZATION FAILURE |      |     |      |       |       |       |       |                      |
| $I_f$      | 0.1×IC <sub>50</sub>              | 0                      | 3    | 1   | 1    | 0     | 0     | 0     | 1     | 3                    |
|            | IC <sub>50</sub>                  | 1                      | 15   | 3   | 7    | 1     | 2     | 3     | 3     | 5                    |
|            | 2×IC <sub>50</sub>                | 1                      | 21   | 4   | 9    | 1     | 3     | 3     | 4     | 6                    |
|            | FULL                              | 3                      | 35   | 7   | 15   | 2     | 5     | 5     | 7     | 9                    |
| $I_{NaCa}$ | 0.1×IC <sub>50</sub>              | 0                      | 0    | 0   | 0    | 1     | -1    | -1    | -2    | 5                    |
|            | IC <sub>50</sub>                  | -1                     | -2   | 0   | 2    | 8     | -1    | -4    | -7    | 9                    |
|            | 2×IC <sub>50</sub>                | -1                     | -1   | 2   | 6    | 11    | 1     | -3    | -8    | 24                   |
|            | FULL <sup>b</sup>                 | 11                     | 59   | 19  | 33   | -14   | -15   | -18   | -22   | 69                   |
| $I_{to}$   | 0.1×IC <sub>50</sub>              | 0                      | 0    | 0   | 0    | 0     | 0     | 0     | 0     | 2                    |
|            | IC <sub>50</sub>                  | 0                      | -1   | 0   | 1    | 2     | 2     | 2     | 1     | 2                    |
|            | 2×IC <sub>50</sub>                | 0                      | -2   | 1   | 2    | 2     | 2     | 2     | 2     | 7                    |
|            | FULL                              | 0                      | -3   | 2   | 5    | 2     | 3     | 4     | 3     | 11                   |

Table S2a – AP biomarkers changes induced by the different blockade levels in the stimulated atrial-like model. <sup>a</sup>: biomarkers computed 7s after  $I_{Kr}$  blocker administration. <sup>b</sup>: biomarkers computed after 10 beats after  $I_{NaCa}$  full block of, due to non-representative ionic concentration at the steady state.

|            |                                   | MDP (mV)               | VMax (V/s) | APA (mV) | Peak (mV) | APD30 (ms) | APD50 (ms) | APD70 (ms) | APD90 (ms) | APD <sub>ratio</sub> |
|------------|-----------------------------------|------------------------|------------|----------|-----------|------------|------------|------------|------------|----------------------|
|            | Control                           | -71.3                  | 33.9       | 100      | 28.8      | 167        | 222        | 267        | 357        | 1.09                 |
| $I_{Na}$   | 0.1×IC <sub>50</sub>              | -71.5                  | 31.9       | 101      | 29.1      | 169        | 223        | 268        | 358        | 1.11                 |
|            | IC <sub>50</sub>                  | -72.6                  | 21.6       | 100      | 27.8      | 177        | 229        | 270        | 361        | 1.11                 |
|            | 2×IC <sub>50</sub>                | -72.9                  | 17.2       | 100      | 26.7      | 178        | 230        | 269        | 358        | 1.15                 |
|            | FULL                              | -73.6                  | 10.2       | 99       | 25.3      | 176        | 238        | 279        | 366        | 1.24                 |
| $I_{CaL}$  | 0.1×IC <sub>50</sub>              | -71.2                  | 35.5       | 100      | 28.6      | 155        | 206        | 247        | 323        | 1.19                 |
|            | IC <sub>50</sub>                  | -71.2                  | 37.9       | 101      | 29.6      | 91         | 133        | 163        | 198        | 1.62                 |
|            | 2×IC <sub>50</sub>                | -71.2                  | 35.0       | 100      | 28.7      | 65         | 102        | 131        | 159        | 1.59                 |
|            | FULL                              | -71.1                  | 30.5       | 92       | 21.1      | 31         | 58         | 86         | 114        | 1.05                 |
| $I_{Kr}$   | 0.1×IC <sub>50</sub> <sup>a</sup> | -71.4                  | 32.8       | 100      | 29.1      | 173        | 230        | 281        | 378        | 1.08                 |
|            | IC <sub>50</sub> <sup>a</sup>     | -70.1                  | 23.9       | 98       | 27.8      | 209        | 294        | 379        | 499        | 1.03                 |
|            | 2×IC <sub>50</sub> <sup>a</sup>   | -68.6                  | 19.8       | 95       | 26.6      | 227        | 333        | 438        | 557        | 1.10                 |
|            | FULL <sup>a</sup>                 | -60.3                  | 11.7       | 83       | 22.3      | 257        | 424        | 580        | 678        | 1.47                 |
| $I_{Ks}$   | 0.1×IC <sub>50</sub>              | -71.3                  | 34.0       | 100      | 28.9      | 167        | 222        | 267        | 357        | 1.11                 |
|            | IC <sub>50</sub>                  | -71.3                  | 33.7       | 100      | 28.8      | 168        | 223        | 269        | 359        | 1.12                 |
|            | 2×IC <sub>50</sub>                | -71.3                  | 33.7       | 100      | 28.8      | 169        | 224        | 270        | 359        | 1.10                 |
|            | FULL                              | -71.2                  | 33.6       | 100      | 28.8      | 170        | 225        | 271        | 361        | 1.10                 |
| $I_{K1}$   | 0.1×IC <sub>50</sub>              | -70.2                  | 29.9       | 100      | 29.4      | 174        | 231        | 281        | 376        | 1.03                 |
|            | IC <sub>50</sub>                  | -57.0                  | 13.2       | 85       | 28.3      | 192        | 264        | 349        | 563        | 0.44                 |
|            | 2×IC <sub>50</sub>                | REPOLARIZATION FAILURE |            |          |           |            |            |            |            |                      |
|            | FULL                              | REPOLARIZATION FAILURE |            |          |           |            |            |            |            |                      |
| $I_f$      | 0.1×IC <sub>50</sub>              | -71.4                  | 34.2       | 100      | 28.9      | 168        | 223        | 268        | 358        | 1.10                 |
|            | IC <sub>50</sub>                  | -71.9                  | 35.4       | 101      | 29.3      | 170        | 226        | 272        | 366        | 1.09                 |
|            | 2×IC <sub>50</sub>                | -71.9                  | 36.1       | 101      | 29.6      | 170        | 226        | 272        | 365        | 1.09                 |
|            | FULL                              | -72.9                  | 37.4       | 103      | 30.1      | 174        | 231        | 276        | 378        | 1.04                 |
| $I_{NaCa}$ | 0.1×IC <sub>50</sub>              | -71.0                  | 33.2       | 101      | 30.3      | 176        | 231        | 274        | 349        | 1.31                 |
|            | IC <sub>50</sub>                  | -70.9                  | 32.3       | 107      | 35.9      | 220        | 282        | 319        | 357        | 2.25                 |
|            | 2×IC <sub>50</sub>                | -72.9                  | 34.9       | 111      | 38.5      | 236        | 301        | 337        | 369        | 2.74                 |
|            | FULL <sup>b</sup>                 | -85.6                  | 10.5       | 141      | 55.6      | 171        | 255        | 290        | 315        | 4.57                 |
| $I_{to}$   | 0.1×IC <sub>50</sub>              | -71.2                  | 33.7       | 101      | 29.6      | 168        | 223        | 269        | 358        | 1.12                 |
|            | IC <sub>50</sub>                  | -71.0                  | 32.5       | 103      | 31.5      | 171        | 231        | 279        | 366        | 1.23                 |
|            | 2×IC <sub>50</sub>                | -70.9                  | 32.0       | 103      | 32.4      | 172        | 234        | 283        | 369        | 1.27                 |
|            | FULL                              | -70.7                  | 31.1       | 105      | 34.2      | 174        | 241        | 292        | 375        | 1.38                 |

Table S2b – AP biomarkers percent variations with respect to the control AP induced by the different blockade levels in the stimulated atrial-like model. <sup>a</sup>: biomarkers computed 7s after  $I_{Kr}$  blocker administration. <sup>b</sup>: biomarkers computed after 10 beats after  $I_{NaCa}$  full block of, due to non-representative ionic concentration at the steady state.

|            |                                   | Percent variation (%)  |      |     |      |       |       |       |       |                      |
|------------|-----------------------------------|------------------------|------|-----|------|-------|-------|-------|-------|----------------------|
|            |                                   | MDP                    | VMax | APA | Peak | APD30 | APD50 | APD70 | APD90 | APD <sub>ratio</sub> |
| $I_{Na}$   | 0.1×IC <sub>50</sub>              | 0                      | -6   | 1   | 1    | 1     | 1     | 0     | 0     | 2                    |
|            | IC <sub>50</sub>                  | 2                      | -36  | 0   | -4   | 6     | 3     | 1     | 1     | 1                    |
|            | 2×IC <sub>50</sub>                | 2                      | -49  | 0   | -7   | 7     | 4     | 1     | 0     | 6                    |
|            | FULL                              | 3                      | -70  | -1  | -12  | 5     | 7     | 4     | 3     | 14                   |
| $I_{CaL}$  | 0.1×IC <sub>50</sub>              | 0                      | 5    | 0   | -1   | -7    | -7    | -7    | -9    | 9                    |
|            | IC <sub>50</sub>                  | 0                      | 12   | 1   | 3    | -45   | -40   | -39   | -44   | 49                   |
|            | 2×IC <sub>50</sub>                | 0                      | 3    | 0   | 0    | -61   | -54   | -51   | -55   | 46                   |
|            | FULL                              | 0                      | -10  | -8  | -27  | -82   | -74   | -68   | -68   | -3                   |
| $I_{Kr}$   | 0.1×IC <sub>50</sub> <sup>a</sup> | 0                      | -3   | 0   | 1    | 3     | 4     | 5     | 6     | -1                   |
|            | IC <sub>50</sub> <sup>a</sup>     | -2                     | -30  | -2  | -4   | 25    | 33    | 42    | 40    | -5                   |
|            | 2×IC <sub>50</sub> <sup>a</sup>   | -4                     | -42  | -5  | -8   | 36    | 50    | 64    | 56    | 1                    |
|            | FULL <sup>a</sup>                 | -15                    | -65  | -17 | -23  | 54    | 92    | 117   | 90    | 35                   |
| $I_{Ks}$   | 0.1×IC <sub>50</sub>              | 0                      | 0    | 0   | 0    | 0     | 0     | 0     | 0     | 1                    |
|            | IC <sub>50</sub>                  | 0                      | -1   | 0   | 0    | 1     | 1     | 1     | 1     | 3                    |
|            | 2×IC <sub>50</sub>                | 0                      | -1   | 0   | 0    | 1     | 1     | 1     | 1     | 1                    |
|            | FULL                              | 0                      | -1   | 0   | 0    | 2     | 2     | 2     | 1     | 1                    |
| $I_{K1}$   | 0.1×IC <sub>50</sub>              | -2                     | -12  | -1  | 2    | 4     | 4     | 5     | 5     | -6                   |
|            | IC <sub>50</sub>                  | -20                    | -61  | -15 | -2   | 15    | 19    | 31    | 58    | -59                  |
|            | 2×IC <sub>50</sub>                | REPOLARIZATION FAILURE |      |     |      |       |       |       |       |                      |
|            | FULL                              | REPOLARIZATION FAILURE |      |     |      |       |       |       |       |                      |
| $I_f$      | 0.1×IC <sub>50</sub>              | 0                      | 1    | 0   | 0    | 0     | 0     | 0     | 0     | 1                    |
|            | IC <sub>50</sub>                  | 1                      | 4    | 1   | 2    | 2     | 2     | 2     | 3     | 0                    |
|            | 2×IC <sub>50</sub>                | 1                      | 7    | 1   | 3    | 2     | 2     | 2     | 2     | 0                    |
|            | FULL                              | 2                      | 10   | 3   | 4    | 4     | 4     | 3     | 6     | -4                   |
| $I_{NaCa}$ | 0.1×IC <sub>50</sub>              | 0                      | -2   | 1   | 5    | 5     | 4     | 3     | -2    | 20                   |
|            | IC <sub>50</sub>                  | -1                     | -5   | 7   | 24   | 32    | 27    | 19    | 0     | 106                  |
|            | 2×IC <sub>50</sub>                | 2                      | 3    | 11  | 33   | 41    | 36    | 26    | 3     | 151                  |
|            | FULL <sup>b</sup>                 | 20                     | 211  | 41  | 93   | 2     | 15    | 8     | -12   | 319                  |
| $I_{to}$   | 0.1×IC <sub>50</sub>              | 0                      | -1   | 1   | 2    | 1     | 1     | 1     | 0     | 3                    |
|            | IC <sub>50</sub>                  | 0                      | -4   | 2   | 9    | 2     | 4     | 4     | 3     | 13                   |
|            | 2×IC <sub>50</sub>                | -1                     | -6   | 3   | 12   | 3     | 6     | 6     | 4     | 16                   |
|            | FULL                              | -1                     | -8   | 5   | 19   | 4     | 9     | 9     | 5     | 26                   |

Table S3a – AP biomarkers changes induced by the different blockade levels in the adult ORd model ( $I_f$  not present in the ORd model). <sup>a</sup>: biomarkers computed 7s after  $I_{Kr}$  blocker administration. <sup>b</sup>: biomarkers computed after 10 beats after  $I_{NaCa}$  full block

|            |                                   | MDP (mV)               | VMax (V/s) | APA (mV) | Peak (mV) | APD30 (ms) | APD50 (ms) | APD70 (ms) | APD90 (ms) | APD <sub>ratio</sub> |
|------------|-----------------------------------|------------------------|------------|----------|-----------|------------|------------|------------|------------|----------------------|
|            | Control                           | -88.0                  | 259        | 128      | 40.0      | 166        | 208        | 240        | 268        | 1.60                 |
| $I_{Na}$   | 0.1×IC <sub>50</sub>              | -88.0                  | 237        | 127      | 38.9      | 168        | 208        | 242        | 269        | 1.59                 |
|            | IC <sub>50</sub>                  | -88.0                  | 125        | 125      | 36.8      | 173        | 212        | 245        | 273        | 1.63                 |
|            | 2×IC <sub>50</sub>                | -88.0                  | 80         | 125      | 36.7      | 171        | 211        | 244        | 272        | 1.60                 |
|            | FULL                              | -88.2                  | 80         | 40       | -48.0     | 62         | 77         | 89         | 100        | 1.81                 |
| $I_{CaL}$  | 0.1×IC <sub>50</sub>              | -88.1                  | 260        | 128      | 39.9      | 162        | 204        | 237        | 263        | 1.83                 |
|            | IC <sub>50</sub>                  | -88.1                  | 263        | 126      | 38.4      | 139        | 178        | 209        | 237        | 1.50                 |
|            | 2×IC <sub>50</sub>                | -88.1                  | 266        | 126      | 37.9      | 126        | 165        | 199        | 225        | 1.52                 |
|            | FULL                              | -88.1                  | 273        | 126      | 37.5      | 82         | 131        | 172        | 200        | 1.73                 |
| $I_{Kr}$   | 0.1×IC <sub>50</sub> <sup>a</sup> | -87.9                  | 258        | 128      | 40.0      | 175        | 218        | 254        | 282        | 1.56                 |
|            | IC <sub>50</sub> <sup>a</sup>     | -87.9                  | 260        | 128      | 40.5      | 215        | 282        | 339        | 379        | 1.76                 |
|            | 2×IC <sub>50</sub> <sup>a</sup>   | -87.9                  | 259        | 128      | 40.5      | 239        | 324        | 401        | 446        | 1.64                 |
|            | FULL <sup>a</sup>                 | REPOLARIZATION FAILURE |            |          |           |            |            |            |            |                      |
| $I_{Ks}$   | 0.1×IC <sub>50</sub>              | -88.0                  | 259        | 128      | 40.0      | 166        | 209        | 240        | 269        | 1.53                 |
|            | IC <sub>50</sub>                  | -88.0                  | 259        | 128      | 40.1      | 170        | 215        | 249        | 276        | 1.82                 |
|            | 2×IC <sub>50</sub>                | -88.0                  | 259        | 128      | 40.1      | 174        | 217        | 250        | 279        | 1.53                 |
|            | FULL                              | -87.9                  | 259        | 128      | 39.8      | 180        | 223        | 258        | 285        | 1.89                 |
| $I_{K1}$   | 0.1×IC <sub>50</sub>              | -88.0                  | 259        | 128      | 40.1      | 165        | 208        | 241        | 269        | 1.72                 |
|            | IC <sub>50</sub>                  | -88.2                  | 262        | 128      | 40.2      | 166        | 208        | 242        | 280        | 1.41                 |
|            | 2×IC <sub>50</sub>                | -88.3                  | 264        | 129      | 40.4      | 166        | 208        | 242        | 287        | 1.16                 |
|            | FULL                              | -92.8                  | 273        | 136      | 42.8      | 165        | 208        | 248        | 352        | 0.94                 |
| $I_{NaCa}$ | 0.1×IC <sub>50</sub>              | -88.0                  | 259        | 128      | 40.1      | 163        | 205        | 238        | 265        | 1.67                 |
|            | IC <sub>50</sub>                  | -88.0                  | 261        | 128      | 40.2      | 150        | 190        | 221        | 249        | 1.47                 |
|            | 2×IC <sub>50</sub>                | -88.0                  | 262        | 128      | 40.2      | 149        | 185        | 216        | 244        | 1.31                 |
|            | FULL <sup>b</sup>                 | -88.0                  | 262        | 128      | 40.2      | 142        | 176        | 204        | 229        | 1.46                 |
| $I_{to}$   | 0.1×IC <sub>50</sub>              | -88.0                  | 259        | 128      | 40.3      | 166        | 207        | 240        | 267        | 1.61                 |
|            | IC <sub>50</sub>                  | -88.0                  | 259        | 129      | 41.4      | 164        | 207        | 240        | 268        | 1.76                 |
|            | 2×IC <sub>50</sub>                | -88.0                  | 259        | 130      | 41.9      | 162        | 205        | 240        | 268        | 1.87                 |
|            | FULL                              | -87.9                  | 259        | 131      | 43.1      | 160        | 205        | 239        | 267        | 1.95                 |

Table S3b – AP biomarkers percent variations with respect to the control AP induced by the different blockade levels in the adult ORd model. <sup>a</sup>: biomarkers computed 7s after  $I_{Kr}$  blocker administration. <sup>b</sup>: biomarkers computed after 10 beats after  $I_{NaCa}$  full block

|            |                                   | Percent variation (%)  |      |     |      |       |       |       |       |                      |
|------------|-----------------------------------|------------------------|------|-----|------|-------|-------|-------|-------|----------------------|
|            |                                   | MDP                    | VMax | APA | Peak | APD30 | APD50 | APD70 | APD90 | APD <sub>ratio</sub> |
| $I_{Na}$   | 0.1×IC <sub>50</sub>              | 0                      | -8   | -1  | -3   | 2     | 0     | 1     | 0     | -1                   |
|            | IC <sub>50</sub>                  | 0                      | -52  | -3  | -8   | 4     | 2     | 2     | 2     | 2                    |
|            | 2×IC <sub>50</sub>                | 0                      | -69  | -3  | -8   | 3     | 2     | 2     | 1     | 0                    |
|            | FULL                              | 0                      | -46  | -3  | -11  | -1    | 2     | 2     | 1     | 13                   |
| $I_{CaL}$  | 0.1×IC <sub>50</sub>              | 0                      | 1    | 0   | 0    | -2    | -2    | -1    | -2    | 14                   |
|            | IC <sub>50</sub>                  | 0                      | 2    | -1  | -4   | -16   | -14   | -13   | -12   | -6                   |
|            | 2×IC <sub>50</sub>                | 0                      | 3    | -2  | -5   | -24   | -21   | -17   | -16   | -5                   |
|            | FULL                              | 0                      | 5    | -2  | -6   | -50   | -37   | -28   | -25   | 8                    |
| $I_{Kr}$   | 0.1×IC <sub>50</sub> <sup>a</sup> | 0                      | 0    | 0   | 0    | 6     | 5     | 6     | 5     | -3                   |
|            | IC <sub>50</sub> <sup>a</sup>     | 0                      | 0    | 0   | 1    | 30    | 36    | 41    | 41    | 10                   |
|            | 2×IC <sub>50</sub> <sup>a</sup>   | 0                      | 0    | 0   | 1    | 45    | 56    | 67    | 66    | 2                    |
|            | FULL <sup>a</sup>                 | REPOLARIZATION FAILURE |      |     |      |       |       |       |       |                      |
| $I_{Ks}$   | 0.1×IC <sub>50</sub>              | 0                      | 0    | 0   | 0    | 0     | 1     | 0     | 0     | -5                   |
|            | IC <sub>50</sub>                  | 0                      | 0    | 0   | 0    | 3     | 4     | 4     | 3     | 14                   |
|            | 2×IC <sub>50</sub>                | 0                      | 0    | 0   | 0    | 5     | 4     | 4     | 4     | -5                   |
|            | FULL                              | 0                      | 0    | 0   | -1   | 9     | 7     | 8     | 6     | 18                   |
| $I_{K1}$   | 0.1×IC <sub>50</sub>              | 0                      | 0    | 0   | 0    | -1    | 0     | 1     | 0     | 8                    |
|            | IC <sub>50</sub>                  | 0                      | 1    | 0   | 1    | 0     | 0     | 1     | 4     | -12                  |
|            | 2×IC <sub>50</sub>                | 0                      | 2    | 1   | 1    | 0     | 0     | 1     | 7     | -28                  |
|            | FULL                              | 5                      | 5    | 6   | 7    | 0     | 0     | 3     | 31    | -41                  |
| $I_{NaCa}$ | 0.1×IC <sub>50</sub>              | 0                      | 0    | 0   | 0    | -1    | -1    | -1    | -1    | 4                    |
|            | IC <sub>50</sub>                  | 0                      | 1    | 0   | 0    | -9    | -8    | -8    | -7    | -8                   |
|            | 2×IC <sub>50</sub>                | 0                      | 1    | 0   | 1    | -10   | -11   | -10   | -9    | -18                  |
|            | FULL <sup>b</sup>                 | 0                      | 1    | 0   | 0    | -15   | -15   | -15   | -15   | -9                   |
| $I_{to}$   | 0.1×IC <sub>50</sub>              | 0                      | 0    | 0   | 1    | 0     | 0     | 0     | 0     | 1                    |
|            | IC <sub>50</sub>                  | 0                      | 0    | 1   | 3    | -1    | -1    | 0     | 0     | 10                   |
|            | 2×IC <sub>50</sub>                | 0                      | 0    | 2   | 5    | -2    | -1    | 0     | 0     | 17                   |
|            | FULL                              | 0                      | 0    | 2   | 8    | -4    | -1    | 0     | -1    | 22                   |



Table S4– Comparison between spontaneous (GRAY) and stimulated (WHITE) ventricular-like hiPSC-CM APs. Biomarkers are presented as percent variations with respect to the control AP induced by the different blockade levels in the stimulated ventricular-like model. <sup>a</sup>: biomarkers computed 7s after  $I_{Kr}$  blocker administration. <sup>b</sup>: biomarkers computed after 10 beats after  $I_{NaCa}$  full block.

|              |                             | Percent variation (%) |      |     |      |       |       |       |       |
|--------------|-----------------------------|-----------------------|------|-----|------|-------|-------|-------|-------|
|              |                             | MDP                   | VMax | APA | Peak | APD30 | APD50 | APD70 | APD90 |
| $I_{Na}$     | 0.1× $I_{CaL}$              | 0                     | -13  | -1  | -6   | 2     | 2     | 1     | 0     |
|              |                             | 0                     | -6   | -1  | -4   | 3     | 3     | 1     | 0     |
|              | $I_{CaL}$                   | NO SPONTANEOUS APs    |      |     |      |       |       |       |       |
|              |                             | 0                     | -39  | -6  | -18  | 13    | 13    | 4     | 1     |
| 2× $I_{CaL}$ | NO SPONTANEOUS APs          |                       |      |     |      |       |       |       |       |
|              | 1                           | -53                   | -7   | -23 | 14   | 3     | 0     | 1     |       |
| $I_{CaL}$    | 0.1× $I_{CaL}$              | 0                     | -2   | -2  | -6   | -14   | -12   | -11   | -9    |
|              |                             | 0                     | 3    | 1   | 1    | -13   | -10   | -9    | -8    |
|              | $I_{CaL}$                   | -2                    | -17  | -11 | -36  | -67   | -56   | -50   | -44   |
|              |                             | 0                     | 9    | 2   | 5    | -72   | -59   | -54   | -52   |
|              | 2× $I_{CaL}$                | -3                    | -17  | -14 | -46  | -79   | -71   | -65   | -58   |
|              |                             | 0                     | 5    | 0   | 2    | -82   | -73   | -68   | -65   |
| $I_{Kr}$     | 0.1× $I_{CaL}$ <sup>a</sup> | 0                     | 1    | 0   | 1    | 4     | 5     | 4     | 4     |
|              |                             | 0                     | -1   | 0   | -1   | 5     | 5     | 5     | 5     |
|              | $I_{CaL}$ <sup>a</sup>      | 0                     | 3    | 1   | 2    | 31    | 34    | 32    | 30    |
|              |                             | 0                     | -20  | -4  | -12  | 44    | 43    | 40    | 38    |
|              | 2× $I_{CaL}$ <sup>a</sup>   | 0                     | 3    | 1   | 2    | 47    | 52    | 50    | 45    |
|              |                             | 0                     | -35  | -6  | -17  | 63    | 64    | 59    | 56    |
| $I_{Ks}$     | 0.1× $I_{CaL}$              | 0                     | 0    | 0   | 0    | 0     | 0     | 0     | 0     |
|              |                             | 0                     | 0    | 0   | 0    | 0     | 0     | 0     | 0     |
|              | $I_{CaL}$                   | 0                     | 0    | 0   | 0    | 1     | 1     | 1     | 1     |
|              |                             | 0                     | -1   | 0   | 0    | 2     | 2     | 2     | 1     |
|              | 2× $I_{CaL}$                | 0                     | 0    | 0   | 0    | 2     | 2     | 1     | 1     |
|              |                             | 0                     | -1   | 0   | -1   | 2     | 2     | 2     | 2     |
| $I_{K1}$     | 0.1× $I_{CaL}$              | -1                    | -18  | -1  | -2   | 8     | 5     | 5     | 6     |
|              |                             | -1                    | -11  | -3  | -5   | 8     | 4     | 4     | 4     |
|              | $I_{CaL}$                   | -9                    | -79  | -6  | 2    | 39    | 31    | 36    | 48    |
|              |                             | -9                    | -53  | -9  | -9   | 26    | 18    | 24    | 28    |
|              | 2× $I_{CaL}$                | -15                   | -80  | -9  | 7    | 47    | 39    | 54    | 78    |
|              |                             | -16                   | -65  | -14 | -12  | 30    | 22    | 34    | 50    |
| $I_f$        | 0.1× $I_{CaL}$              | 0                     | 9    | 1   | 4    | 0     | 1     | 1     | 1     |
|              |                             | 0                     | 3    | 1   | 1    | 0     | 0     | 0     | 1     |
|              | $I_{CaL}$                   | 1                     | 58   | 7   | 24   | -3    | 3     | 5     | 5     |
|              |                             | 1                     | 15   | 3   | 7    | 1     | 2     | 3     | 3     |
|              | 2× $I_{CaL}$                | 2                     | 88   | 10  | 35   | -5    | 5     | 7     | 6     |
|              |                             | 1                     | 21   | 4   | 9    | 1     | 3     | 3     | 4     |
| $I_{NaCa}$   | 0.1× $I_{CaL}$              | 0                     | 1    | 0   | 2    | 0     | -1    | -2    | -2    |
|              |                             | 0                     | 0    | 0   | 0    | 1     | -1    | -1    | -2    |
|              | $I_{CaL}$                   | -1                    | 5    | 4   | 16   | 6     | -2    | -6    | -8    |
|              |                             | -1                    | -2   | 0   | 2    | 8     | -1    | -4    | -7    |
|              | 2× $I_{CaL}$                | -1                    | 6    | 6   | 25   | 10    | 0     | -5    | -8    |
|              |                             | -1                    | -1   | 2   | 6    | 11    | 1     | -3    | -8    |
| $I_{to}$     | 0.1× $I_{CaL}$              | 0                     | 0    | 0   | 0    | 0     | 0     | 0     | 0     |
|              |                             | 0                     | 0    | 0   | 0    | 0     | 0     | 0     | 0     |
|              | $I_{CaL}$                   | 0                     | 0    | 1   | 3    | 0     | 1     | 1     | 1     |
|              |                             | 0                     | -1   | 0   | 1    | 2     | 2     | 2     | 1     |
|              | 2× $I_{CaL}$                | 0                     | 0    | 1   | 5    | 0     | 1     | 2     | 2     |
|              |                             | 0                     | -2   | 1   | 2    | 2     | 2     | 2     | 2     |

Table S5 – Comparison between spontaneous (GRAY) and stimulated (WHITE) atrial-like hiPSC-CM APs. Biomarkers are presented as percent variations with respect to the control AP induced by the different blockade levels in the stimulated atrial-like model. <sup>a</sup>: biomarkers computed 7s after  $I_{Kr}$  blocker administration. <sup>b</sup>: biomarkers computed after 10 beats after  $I_{NaCa}$  full block.

|            |                                   | Percent variation (%)  |      |     |      |       |       |       |       |
|------------|-----------------------------------|------------------------|------|-----|------|-------|-------|-------|-------|
|            |                                   | MDP                    | VMax | APA | Peak | APD30 | APD50 | APD70 | APD90 |
| $I_{Na}$   | 0.1×IC <sub>50</sub>              | 0                      | -9   | 0   | 0    | 2     | 2     | 1     | 0     |
|            |                                   | 0                      | -6   | 1   | 1    | 1     | 1     | 0     | 0     |
|            | IC <sub>50</sub>                  | 1                      | -59  | 0   | -5   | 9     | 9     | 7     | 4     |
|            |                                   | 2                      | -36  | 0   | -4   | 6     | 3     | 1     | 1     |
|            | 2×IC <sub>50</sub>                | 2                      | -71  | 0   | -4   | 23    | 25    | 27    | 16    |
|            |                                   | 2                      | -49  | 0   | -7   | 6     | 4     | 1     | 0     |
| $I_{CaL}$  | 0.1×IC <sub>50</sub>              | 0                      | -3   | -2  | -6   | -9    | -9    | -10   | -11   |
|            |                                   | 0                      | 5    | 0   | -1   | -7    | -7    | -7    | -9    |
|            | IC <sub>50</sub>                  | -2                     | -29  | -13 | -43  | -41   | -41   | -41   | -41   |
|            |                                   | 0                      | 12   | 1   | 3    | -45   | -40   | -39   | -44   |
|            | 2×IC <sub>50</sub>                | -3                     | -42  | -20 | -67  | -53   | -51   | -49   | -48   |
|            |                                   | 0                      | 3    | 0   | 0    | -61   | -54   | -51   | -55   |
| $I_{Kr}$   | 0.1×IC <sub>50</sub> <sup>a</sup> | 0                      | -3   | 0   | 2    | 7     | 8     | 9     | 8     |
|            |                                   | 0                      | -3   | 0   | 1    | 3     | 4     | 5     | 6     |
|            | IC <sub>50</sub> <sup>a</sup>     | -2                     | -23  | 3   | 16   | 65    | 73    | 81    | 70    |
|            |                                   | -2                     | -30  | -2  | -4   | 25    | 33    | 42    | 40    |
|            | 2×IC <sub>50</sub> <sup>a</sup>   | -4                     | -36  | 4   | 26   | 106   | 123   | 140   | 116   |
|            |                                   | -4                     | -42  | -5  | -8   | 36    | 50    | 64    | 56    |
| $I_{Ks}$   | 0.1×IC <sub>50</sub>              | 0                      | 0    | 0   | 0    | 0     | 0     | 0     | 0     |
|            |                                   | 0                      | 0    | 0   | 0    | 0     | 0     | 0     | 0     |
|            | IC <sub>50</sub>                  | 0                      | -1   | 0   | 0    | 1     | 1     | 1     | 1     |
|            |                                   | 0                      | -1   | 0   | 0    | 1     | 1     | 1     | 1     |
|            | 2×IC <sub>50</sub>                | 0                      | -1   | 0   | 0    | 1     | 1     | 1     | 1     |
|            |                                   | 0                      | -1   | 0   | 0    | 1     | 1     | 1     | 1     |
| $I_{K1}$   | 0.1×IC <sub>50</sub>              | -1                     | -21  | -1  | 0    | 5     | 5     | 6     | 8     |
|            |                                   | -2                     | -12  | -1  | 2    | 4     | 4     | 5     | 5     |
|            | IC <sub>50</sub>                  | -14                    | -84  | -11 | -5   | 21    | 25    | 45    | 76    |
|            |                                   | -20                    | -61  | -15 | -2   | 15    | 19    | 31    | 58    |
|            | 2×IC <sub>50</sub>                | REPOLARIZATION FAILURE |      |     |      |       |       |       |       |
|            |                                   | REPOLARIZATION FAILURE |      |     |      |       |       |       |       |
| $I_f$      | 0.1×IC <sub>50</sub>              | 0                      | 4    | 0   | 1    | 1     | 1     | 1     | 0     |
|            |                                   | 0                      | 1    | 0   | 0    | 0     | 0     | 0     | 0     |
|            | IC <sub>50</sub>                  | 1                      | 30   | 3   | 7    | 4     | 5     | 5     | 3     |
|            |                                   | 1                      | 4    | 1   | 2    | 2     | 2     | 2     | 3     |
|            | 2×IC <sub>50</sub>                | 1                      | 44   | 4   | 12   | 5     | 7     | 6     | 4     |
|            |                                   | 1                      | 7    | 1   | 2    | 2     | 2     | 2     | 2     |
| $I_{NaCa}$ | 0.1×IC <sub>50</sub>              | 0                      | -3   | 1   | 3    | 5     | 4     | 2     | -2    |
|            |                                   | 0                      | -2   | 1   | 5    | 5     | 4     | 3     | -2    |
|            | IC <sub>50</sub>                  | -1                     | -21  | 6   | 23   | 36    | 29    | 20    | 3     |
|            |                                   | -1                     | -5   | 7   | 24   | 32    | 27    | 19    | 0     |
|            | 2×IC <sub>50</sub>                | 1                      | -26  | 9   | 32   | 51    | 42    | 30    | 9     |
|            |                                   | 2                      | 3    | 11  | 33   | 41    | 36    | 26    | 3     |
| $I_{to}$   | 0.1×IC <sub>50</sub>              | 0                      | -1   | 0   | 1    | 0     | 1     | 1     | 0     |
|            |                                   | 0                      | -1   | 1   | 2    | 1     | 1     | 1     | 0     |
|            | IC <sub>50</sub>                  | 0                      | -3   | 2   | 7    | 1     | 3     | 3     | 2     |
|            |                                   | 0                      | -4   | 2   | 9    | 2     | 4     | 4     | 3     |
|            | 2×IC <sub>50</sub>                | 0                      | -4   | 2   | 9    | 1     | 4     | 4     | 3     |
|            |                                   | -1                     | -6   | 3   | 12   | 3     | 6     | 6     | 4     |

## Supplementary figures

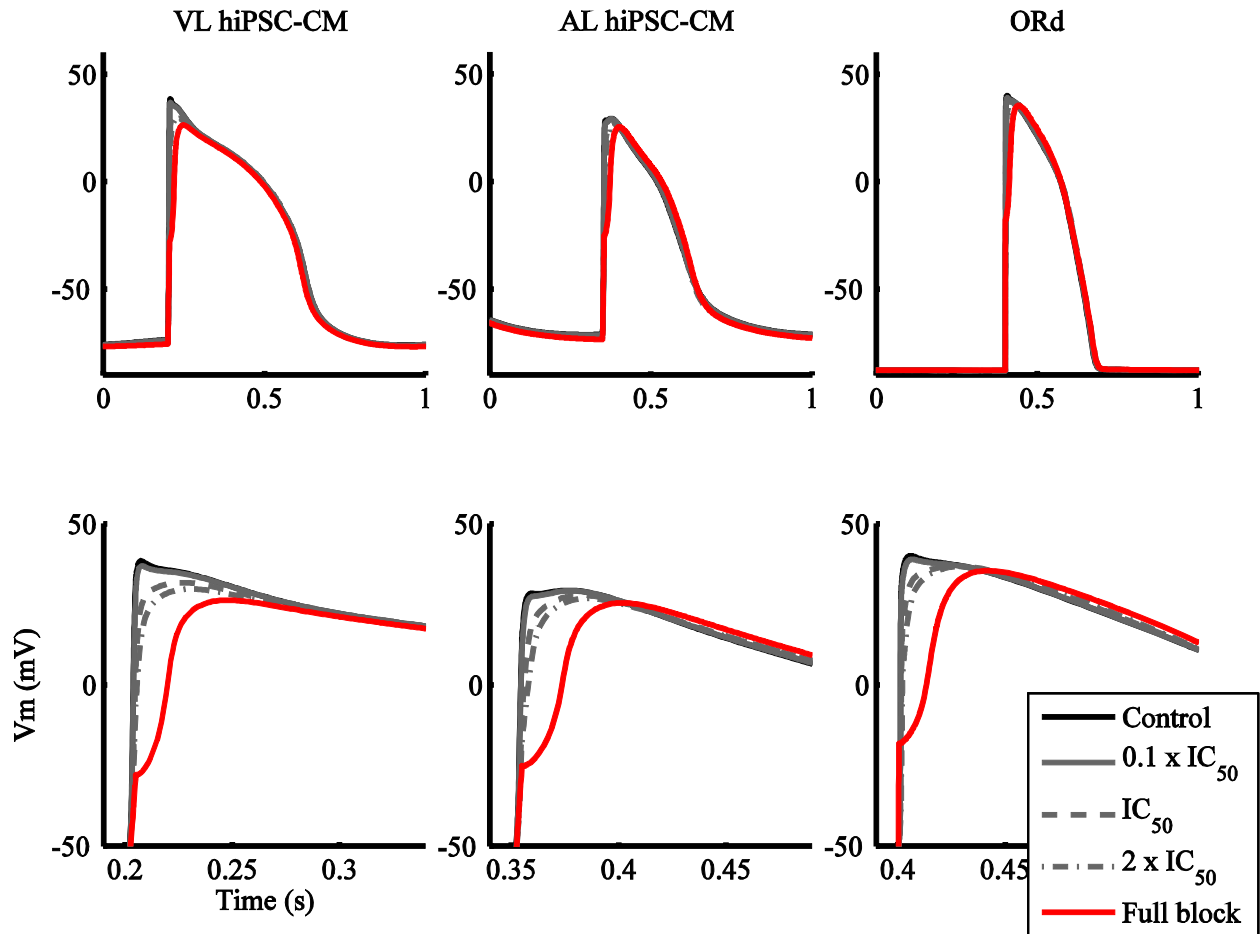

Figure S1 – Details of the effect of  $I_{Na}$  block on the upstroke.

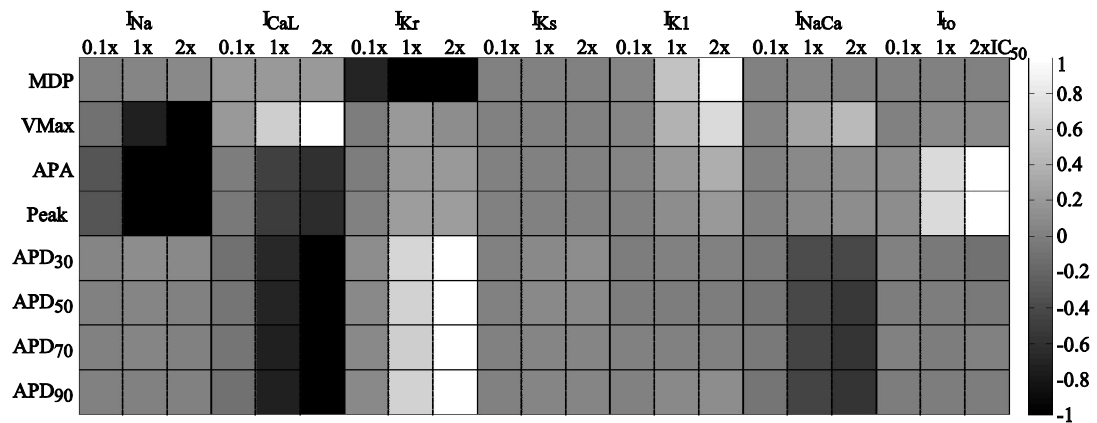

Figure S2 - Global comparison of the effect of ionic current blocks on the morphological action potential (AP) biomarkers simulated by the hAdultV-CM model. The pacing rate is 60 bpm. Grey levels represent the percent variation of each biomarker (normalized in the interval [-1, 1]) for each block level. MDP: maximum diastolic potential,  $V_{Max}$ : maximum upstroke velocity, APA: action potential amplitude, Peak: peak voltage, APD<sub>xx</sub>: action potential duration at XX% of repolarization.

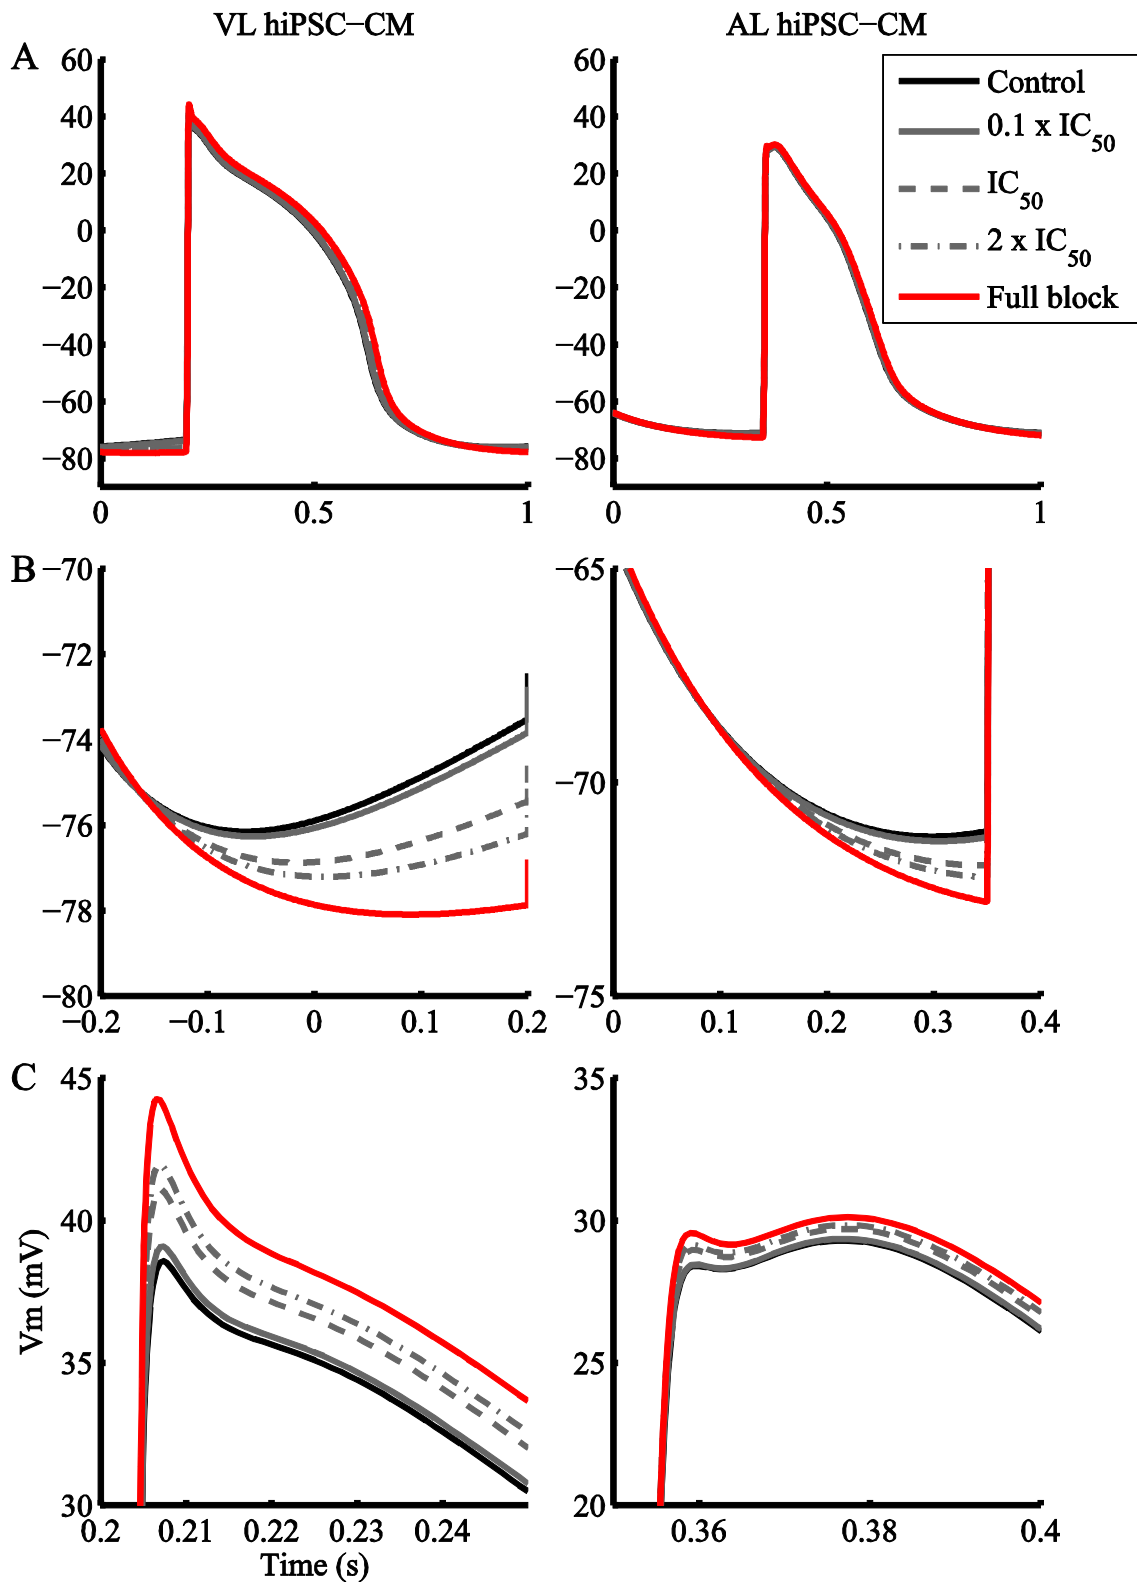

Figure S3 –  $I_f$  block effects on VL hiPSC-CM and hAL hiPSC-CM. In panels B and C the effects on MDP and Peak have been detailed, respectively.

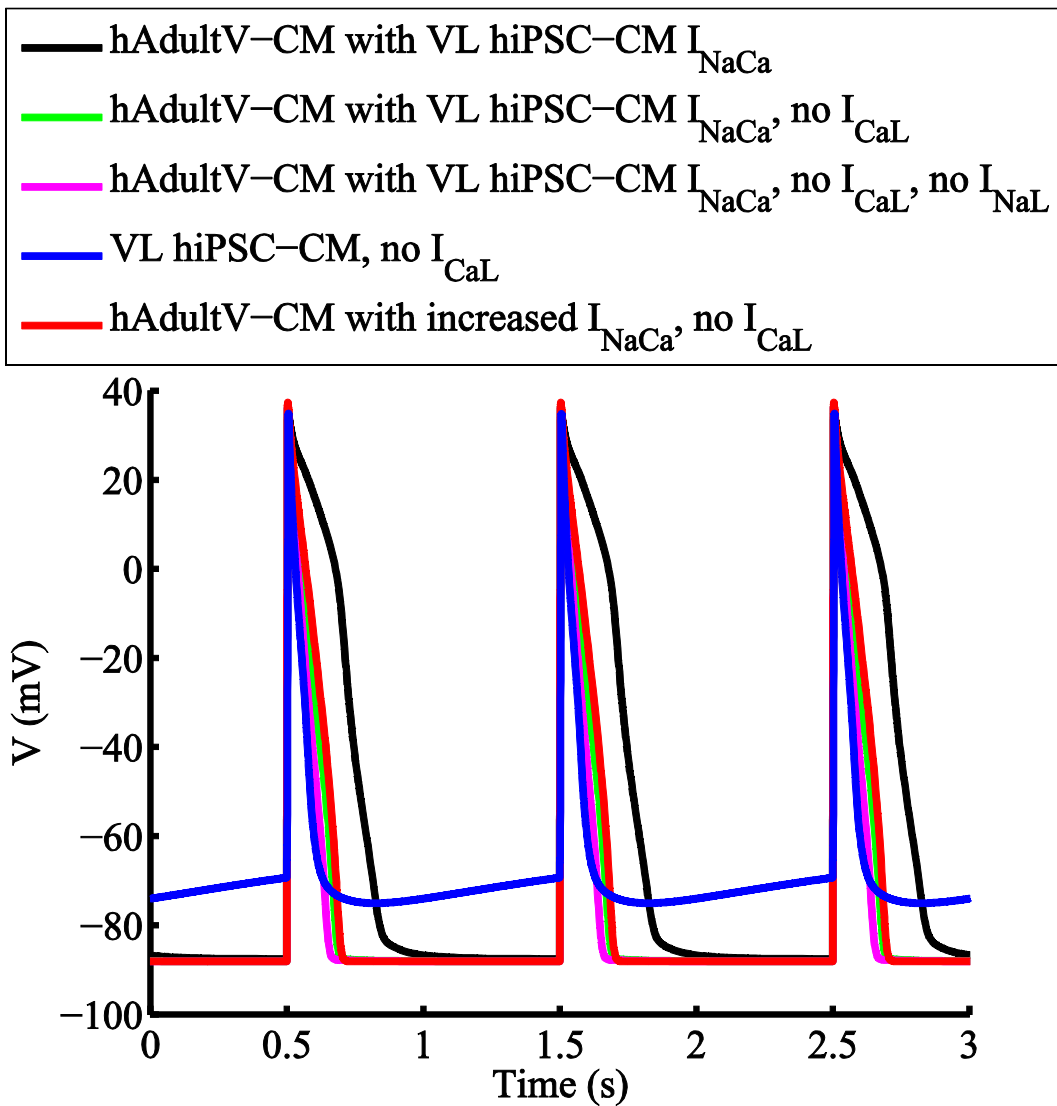

Figure S4 – Assessment of the different contributions that sustain the AP in the hAdultV-CM (ORD) model and comparison with full  $I_{CaL}$  block in VL hiPSC-CM. Black, green and magenta traces refer to hAdultV-CM hybridized with the VL hiPSC-CM  $I_{NaCa}$ . The red trace refers to the hAdultV-CM model where its original  $I_{NaCa}$

was increased 3.2 times.

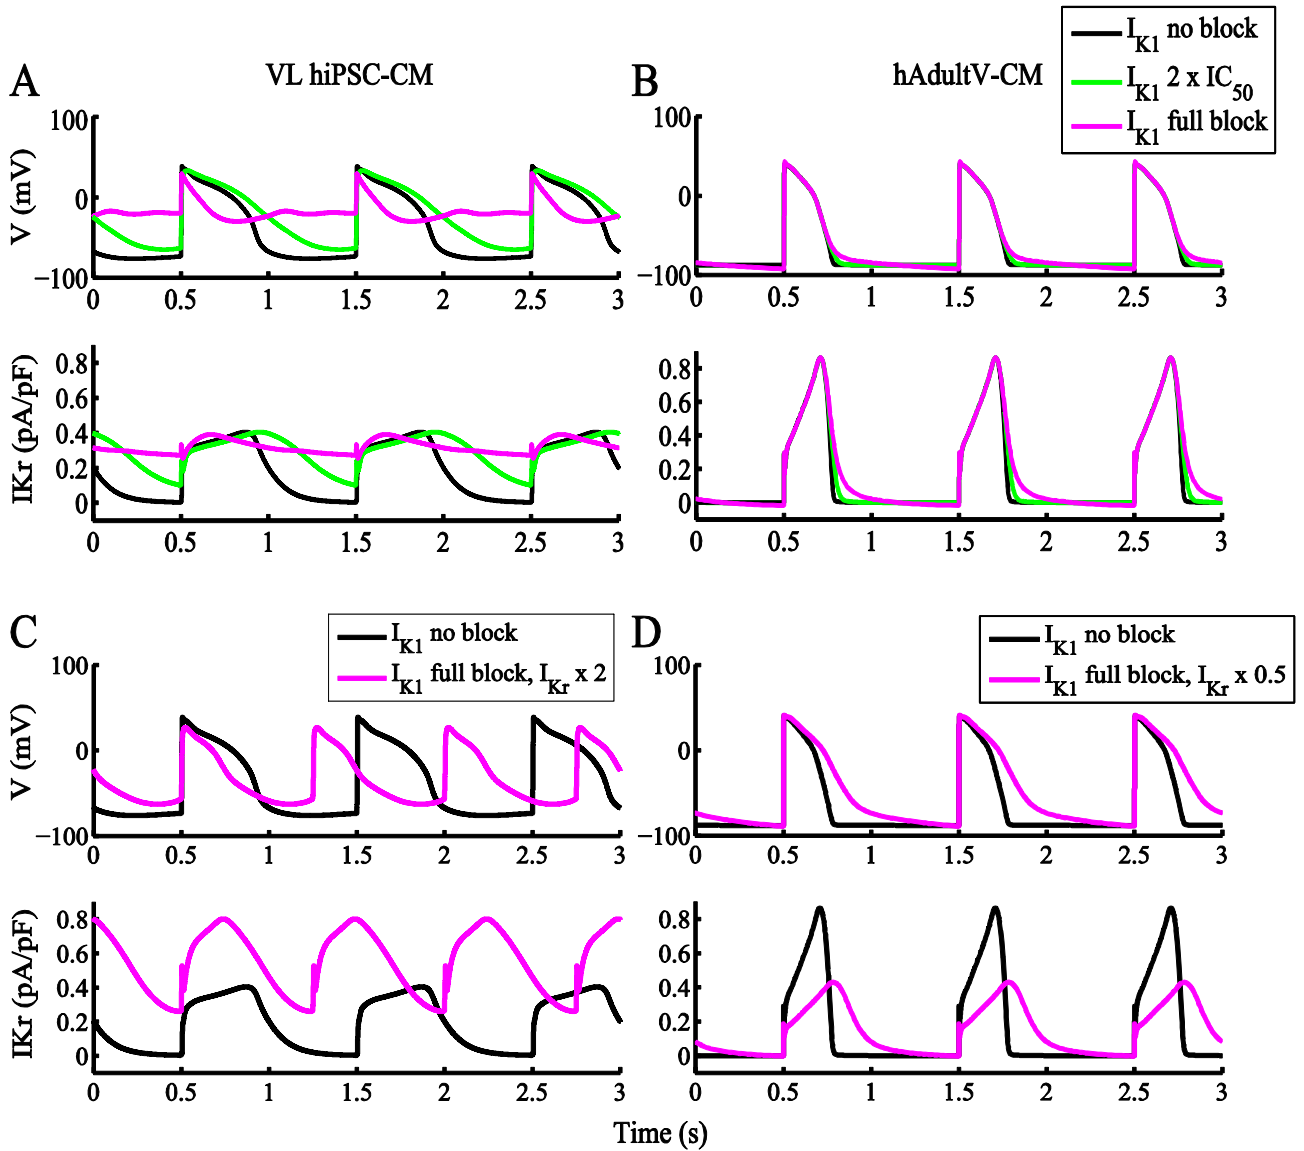

Figure S5 – Assessment of the repolarization reserve in VL hiPSC-CM and hAdultV-CM. A and B: comparison of different  $I_{K1}$  blocks on the APs and the underlying  $I_{Kr}$ . C: compensation of the  $I_{K1}$  block by doubling  $I_{Kr}$  (increment to 80 bpm of the pacing rate is needed to avoid spontaneous APs). D: the halved  $I_{Kr}$  and the consequent slower repolarization show how  $I_{Kr}$  compensates the absence of  $I_{K1}$  in adult cells.

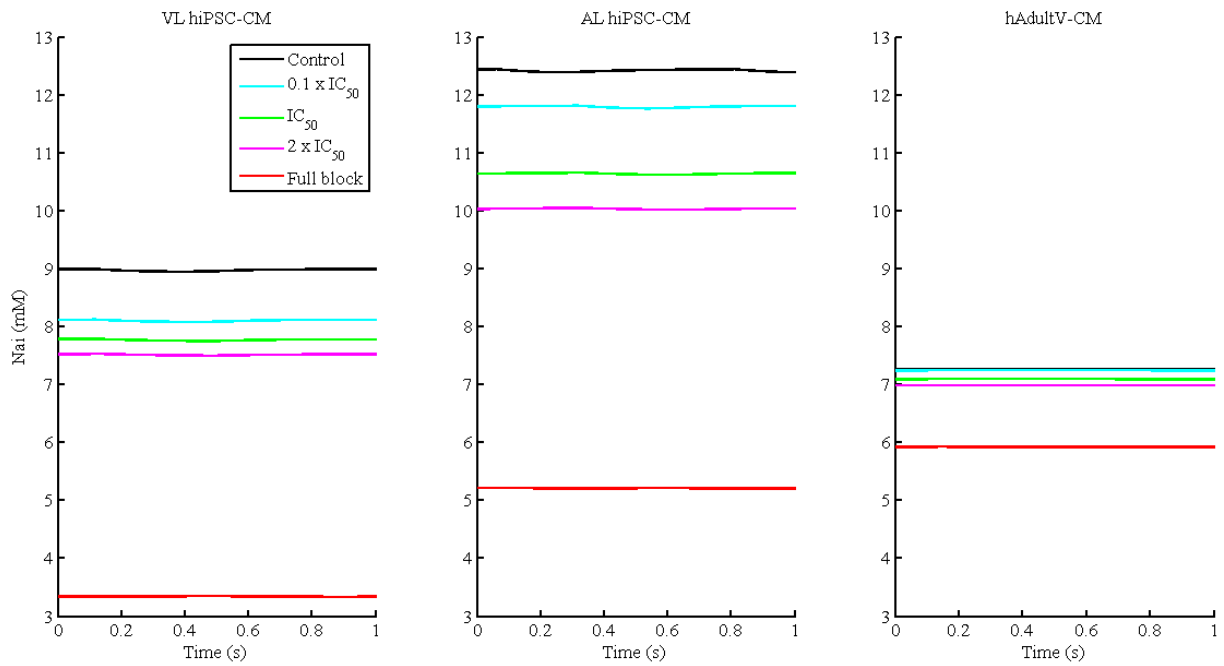

Figure S6 –  $\text{Na}^+$  concentration in conditions of  $I_{\text{NaCa}}$  block.

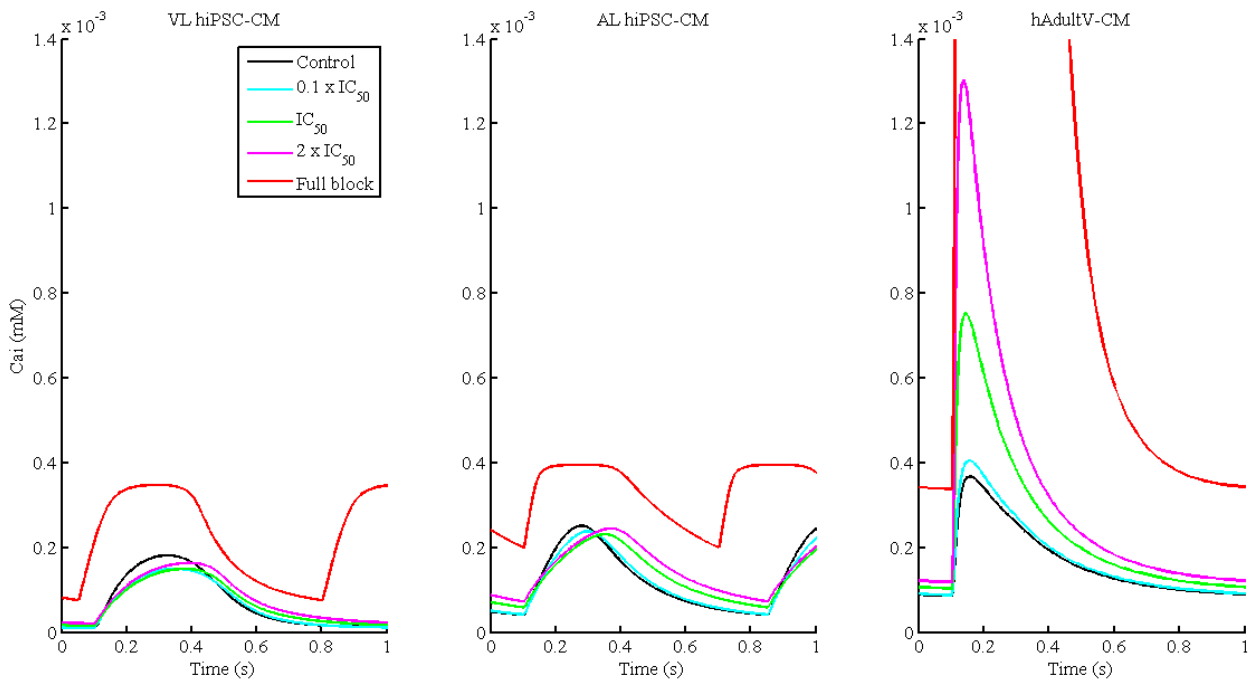

Figure S7 –  $\text{Ca}^{2+}$  concentration in conditions of  $I_{\text{NaCa}}$  block. Peak of hAdultV-CM  $\text{Ca}^{2+}$  transient equals to 0.022 mM.

## Bibliography

O'Hara T, Virág L, Varró A, and Rudy Y (2011). Simulation of the Undiseased Human Cardiac Ventricular Action Potential: Model Formulation and Experimental Validation. *PLoS Comput Biol* 7: e1002061.

Paci M, Hyttinen J, Aalto-Setälä K, and Severi S (2013). Computational models of ventricular- and atrial-like human induced pluripotent stem cell derived cardiomyocytes. *Ann Biomed Eng* 41: 2334–2348.
